# Supplementary material for: Low-temperature hydrothermal synthesis of WO3 nanorods and their sensing properties for NO2
Source: Royal Society of Chemistry journal article supplement (doi:10.1039/c2jm30997a), 2012-01-01
Supplement: c2jm30997a.pdf [file c2jm30997a.pdf]

Electronic Supplementary Information for

**Low-temperature hydrothermal synthesis of WO<sub>3</sub> nanorods and their  
sensing properties for NO<sub>2</sub>**

Shouli Bai,<sup>a</sup> Kewei Zhang,<sup>a</sup> Ruixian Luo,<sup>\*a</sup> Dianqing Li,<sup>a</sup> Aifan Chen,<sup>a</sup> and Chung Chiun Liu<sup>b</sup>

<sup>a</sup> State Key Laboratory of Chemical Resource Engineering, Beijing University of Chemical  
Technology, Beijing 100029 China

<sup>b</sup> Department of Chemical Engineering, Case Western Reserve University,  
Cleveland OH 44106 USA

\*Corresponding author:

Tel.: + 86 010 64961040

E-mail: luorx@mail.buct.edu.cn

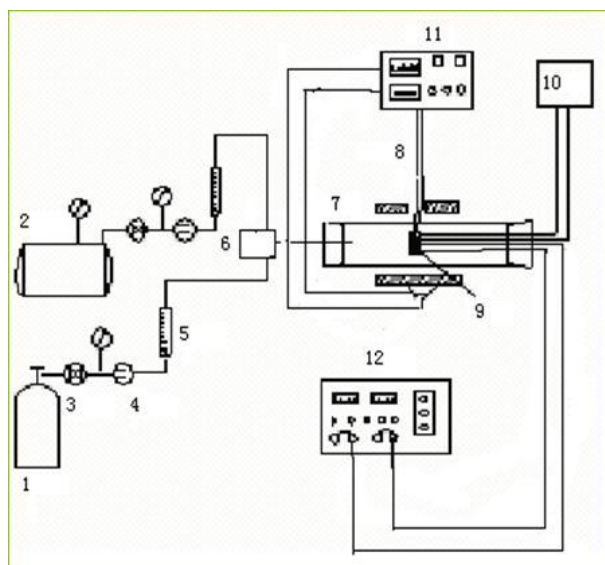

**Figure S1.** The schematic diagram of gas-sensing test apparatus.

1. gas cylinder, 2. air compressor, 3. regulators valve, 4. steady flow valve, 5. flow meter, 6. mixer,
7. quartz tube, 8. tube furnace, 9. sensor element, 10. data acquisition system, 11. temperature programmed controller, 12. transistor constant potential instrument.

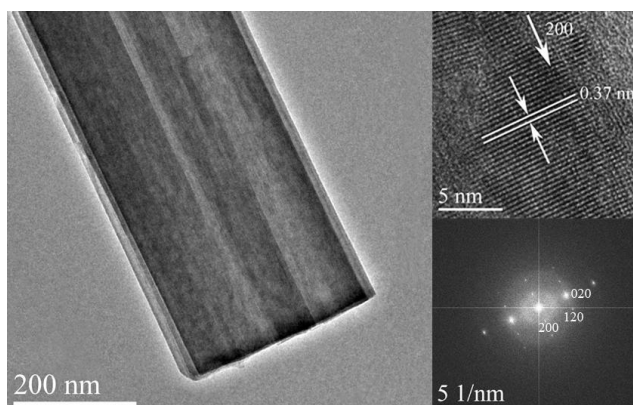

**Figure S2.** TEM image, HR-TEM image and the corresponding selected-area electron diffraction (SAED) pattern of as-synthesized nanorod.

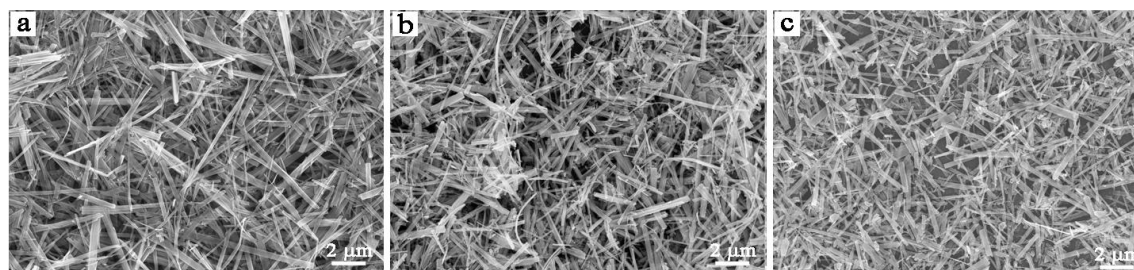

**Figure S3.** FESEM images of  $\text{WO}_3$  nanorods after calcination at (a) 200°C, (b) 600°C, and (c) 800°C.
